# Supplementary material
Source: publisher figshare collection journal article supplement (https://asha.figshare.com/ndownloader/files/36415167)
Supplement: Supplementary file 1 [file 36415167]

## Supplemental Material S1. Open-ended questions and codes.

| Survey question                                                                                                                      | Responses |
|--------------------------------------------------------------------------------------------------------------------------------------|-----------|
| How did you decide where to enroll among the programs where you were accepted?                                                       | 105       |
| Applied to one program (25.7%, $n = 27$ )                                                                                            |           |
| Type of instruction/location (online, in-state, in-person) (24.8%, $n = 26$ )                                                        |           |
| Specifics about the program (reputation, mission, coursework, requirements, faculty) (17.1%, $n = 18$ )                              |           |
| Logistics (timeline, schedule, convenience, ability to work full time, cost of program) (16.2%, $n = 17$ )                           |           |
| Personal research and networking (12.4%, $n = 13$ )                                                                                  |           |
| Other responses (post-program employment opportunities, prior affiliation with university) (3.8%, $n = 4$ )                          |           |
| What was your primary goal in applying for a doctoral program?                                                                       | 115       |
| More knowledge and skills (research/advanced clinical skills) (38.3%, $n = 44$ )                                                     |           |
| Career opportunities/career advancement (32.2%, $n = 37$ )                                                                           |           |
| Obtain a doctorate (13.9%, $n = 16$ )                                                                                                |           |
| Leadership skills (7.8%, $n = 9$ )                                                                                                   |           |
| Other responses (improve speech-language pathology field, job expectations, equal footing with other professionals) (4.4%, $n = 5$ ) |           |
| Salary increase (3.5%, $n = 4$ )                                                                                                     |           |
| What do you see as the advantages of the SLPD degree?                                                                                | 120       |
| More knowledge (expertise, confidence) (40.8%, $n = 49$ )                                                                            |           |
| Career advancement (higher pay, networking, opportunities, leadership opportunities) (21.7%, $n = 26$ )                              |           |
| Logistics and practicalities (modalities, timeline, work schedule, cost of program) (15.8%, $n = 19$ )                               |           |
| Others (mentorship/dissertation/capstone/SLPD over PHD/respect/prestige/additional credential) (11.7%, $n = 14$ )                    |           |
| Not focused on research (clinical focus) (10.0%, $n = 12$ )                                                                          |           |
| What do you see as the disadvantages of the SLPD degree?                                                                             | 98        |
| Issues with lack of prestige and lack of understanding of SLPD (40.8%, $n = 40$ )                                                    |           |
| Financial burden (cost of program, no salary benefit) (22.5%, $n = 22$ )                                                             |           |
| Personal reasons (stress, time away from family) (19.4%, $n = 19$ )                                                                  |           |
| Won't necessarily be able to go into higher education (9.2%, $n = 9$ )                                                               |           |
| No disadvantages (7.1%, $n = 7$ )                                                                                                    |           |
| Limited program choices (1%, $n = 1$ )                                                                                               |           |

|                                                                                                                                                         |     |
|---------------------------------------------------------------------------------------------------------------------------------------------------------|-----|
| Do you think the type of instruction you received (in-person vs. virtual) impacted the quality of your experience in your SLPD program? Please explain. | 79  |
| No responses (55.7%, $n = 44$ )                                                                                                                         |     |
| Yes responses (27.9%, $n = 22$ )                                                                                                                        |     |
| Not sure/ambiguous responses (16.5%, $n = 13$ )                                                                                                         |     |
| No reasons                                                                                                                                              | 30  |
| Virtual was good/necessary (63.3%, $n = 19$ )                                                                                                           |     |
| Great professors (23.3%, $n = 7$ )                                                                                                                      |     |
| Intent of program works for any modality (10.0%, $n = 3$ )                                                                                              |     |
| In-person opportunities (within a virtual program) were beneficial (3.3%, $n = 1$ )                                                                     |     |
| Yes reasons                                                                                                                                             | 18  |
| In-person is helpful (66.7%, $n = 12$ )                                                                                                                 |     |
| Virtual is helpful (22.2%, $n = 4$ )                                                                                                                    |     |
| Hybrid is helpful (5.6%, $n = 1$ )                                                                                                                      |     |
| Helped with networking (5.6%, $n = 1$ )                                                                                                                 |     |
| From a financial standpoint, how did you consider the return on investment with respect to your SLPD degree?                                            | 75  |
| Positive (50.7%, $n = 38$ )                                                                                                                             |     |
| Neutral/didn't consider (33.3%, $n = 25$ )                                                                                                              |     |
| Negative (16.0%, $n = 12$ )                                                                                                                             |     |
| Reasons                                                                                                                                                 | 68  |
| Not about the money/prior awareness of no salary increase (23.5%, $n = 16$ )                                                                            |     |
| Career Advancement (opportunities, goals, promotion) (20.6%, $n = 14$ )                                                                                 |     |
| Pay increase (20.6%, $n = 14$ )                                                                                                                         |     |
| Will pay for itself/cost-efficient (10.3%, $n = 7$ )                                                                                                    |     |
| Negative reason given (no salary increase, will lose money, not worth tuition) (8.8%, $n = 6$ )                                                         |     |
| Employer paid for it (7.4%, $n = 5$ )                                                                                                                   |     |
| Increased job security/retirement benefits (5.9%, $n = 4$ )                                                                                             |     |
| Added to other loans (2.9%, $n = 2$ )                                                                                                                   |     |
| Why would you recommend your specific SLPD program to others?                                                                                           | 101 |
| Program Design (curriculum, modality, diverse program, realistic expectations, flexibility, convenient, ability to work full-time) (39.6%, $n = 40$ )   |     |
| Faculty/care & support (36.6%, $n = 37$ )                                                                                                               |     |
| Other (location, cohort connections, network, cost, resources) (11.9%, $n = 12$ )                                                                       |     |
| Reputation/established program (6.9%, $n = 7$ )                                                                                                         |     |
| Yes (5.0%, $n = 5$ )                                                                                                                                    |     |
| Why wouldn't you recommend your specific SLPD program to others?                                                                                        | 14  |
| Issues with coursework/quality of program (35.7%, $n = 5$ )                                                                                             |     |

|                                                                                                                     |    |
|---------------------------------------------------------------------------------------------------------------------|----|
| Disorganization/lack of direction (35.7%, $n = 5$ )                                                                 |    |
| Other responses (cost, outdated materials, professors, usefulness of the degree) (28.6%, $n = 4$ )                  |    |
| What are your thoughts on requiring a clinical doctorate as an entry-level degree for SLPS?                         | 82 |
| No (54.9%, $n = 45$ )                                                                                               |    |
| Mixed response (25.6%, $n = 21$ )                                                                                   |    |
| Yes (19.5%, $n = 16$ )                                                                                              |    |
| Yes reasons                                                                                                         | 22 |
| More knowledge (36.4%, $n = 8$ )                                                                                    |    |
| Equal respect with other clinical professions (31.8%, $n = 7$ )                                                     |    |
| Inevitable/maybe in the future (31.8%, $n = 7$ )                                                                    |    |
| Yes, but with different tracks and standardization (13.6%, $n = 3$ )                                                |    |
| No reasons                                                                                                          | 58 |
| Shortages (39.7%, $n = 23$ )                                                                                        |    |
| SLPD is better to obtain with experience (22.4%, $n = 13$ )                                                         |    |
| Should be optional/master's is sufficient (22.4%, $n = 13$ )                                                        |    |
| Salary doesn't equal doctorate/too expensive (15.5%, $n = 9$ )                                                      |    |
| How do you feel your SLPD program impacted your career? (graduated/was enrolled but did not complete degree)        | 42 |
| Knowledge, competence, skills, and/or confidence (38.1%, $n = 16$ )                                                 |    |
| New opportunities (21.4%, $n = 9$ )                                                                                 |    |
| Generally beneficial (19.1%, $n = 8$ )                                                                              |    |
| Other responses (networking, resources, contribution to field, gained respect, leadership) (14.3%, $n = 6$ )        |    |
| Little/no impact on career (7.1%, $n = 3$ )                                                                         |    |
| How do you think your SLPD program will impact your career? (currently enrolled/accepted but didn't start yet)      | 51 |
| New opportunities (45.1%, $n = 23$ )                                                                                |    |
| Leadership opportunities (19.6%, $n = 10$ )                                                                         |    |
| Improved skill set/more knowledge/better clinician (15.7%, $n = 8$ )                                                |    |
| Other responses (networking, salary, respect) (11.8%, $n = 6$ )                                                     |    |
| Not sure/not anticipating impact on career (7.8%, $n = 4$ )                                                         |    |
| Based on your experiences so far, has your SLPD program met your expectations? Please explain. (currently enrolled) | 42 |
| Yes (83.3%, $n = 35$ )                                                                                              |    |
| Mixed/unclear (16.7%, $n = 7$ )                                                                                     |    |
| What else would you like to share about your experience pursuing an SLPD degree?                                    | 36 |
| Positive (61.1%, $n = 22$ )                                                                                         |    |
| Mixed/neutral (38.9%, $n = 14$ )                                                                                    |    |

---
